# Supplementary material
Source: publisher figshare collection journal article supplement (https://karger.figshare.com/ndownloader/files/25818608)
Supplement: Supplementary file 1 [file 25818608]

**Table S2.** Percentage of positive results in food panel skin prick test (N = 421).

| **Allergen** | **% positive results (n = 421)** |
| --- | --- |
| Peanut | 81.3% |
| Walnut | 77.3% |
| Hazelnut | 77.3% |
| Sunflower seed | 49.0% |
| Chestnut | 45.3% |
| Almond | 44.2% |
| Pistachio | 36.0% |
| Pine nut | 14.4% |
